# Supplementary material
Source: MDPI journal article supplement (https://www.mdpi.com/2311-5637/3/4/60)
Supplement: s1 [file s1]

# Supplementary Materials: Tuning of the Carbon-to-Nitrogen Ratio for the Production of L-Arginine by *Escherichia coli*

Mireille Ginésy \*, Daniela Rusanova-Naydenova and Ulrika Rova\*

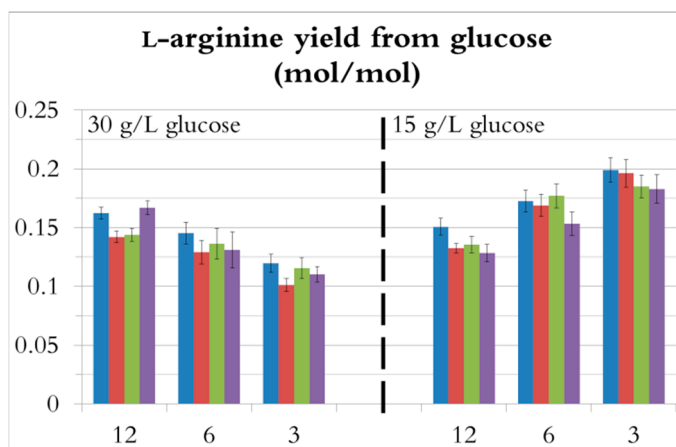

(a)

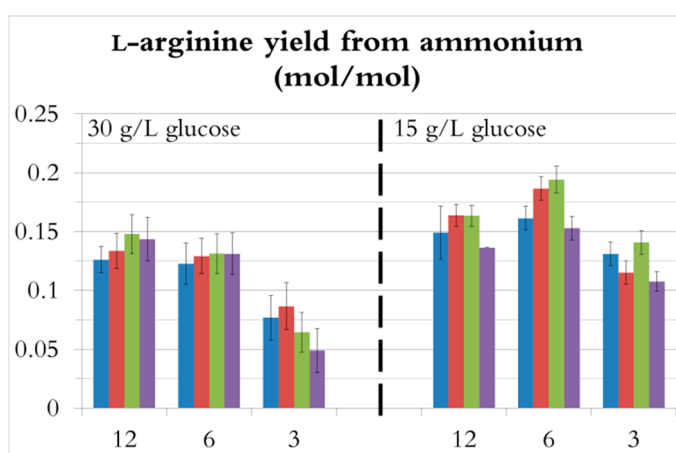

(b)

Figure S1. L-arginine yields from glucose (a) and ammonium (b); (NH<sub>4</sub>)<sub>2</sub>SO<sub>4</sub> in blue, (NH<sub>4</sub>)<sub>2</sub>HPO<sub>4</sub> in red, NH<sub>4</sub>Cl in green, NH<sub>4</sub>OH in purple.

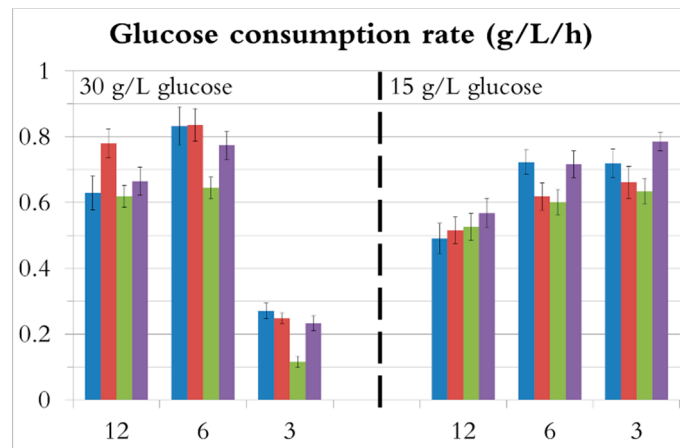

(a)

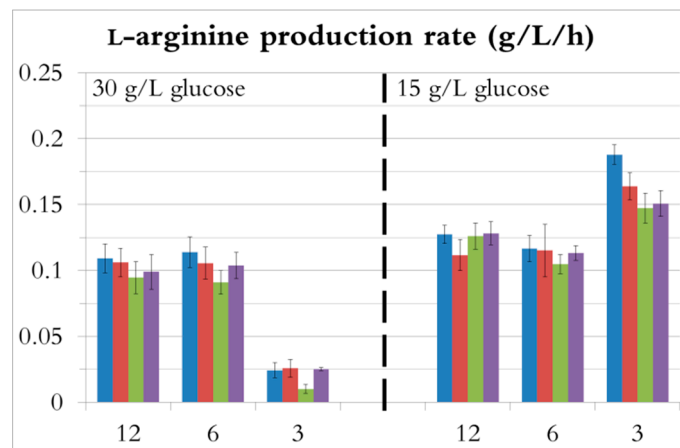

(b)

Figure S2. Rates of glucose consumption (a) and L-arginine production (b); (NH<sub>4</sub>)<sub>2</sub>SO<sub>4</sub> in blue, (NH<sub>4</sub>)<sub>2</sub>HPO<sub>4</sub> in red, NH<sub>4</sub>Cl in green, NH<sub>4</sub>OH in purple.

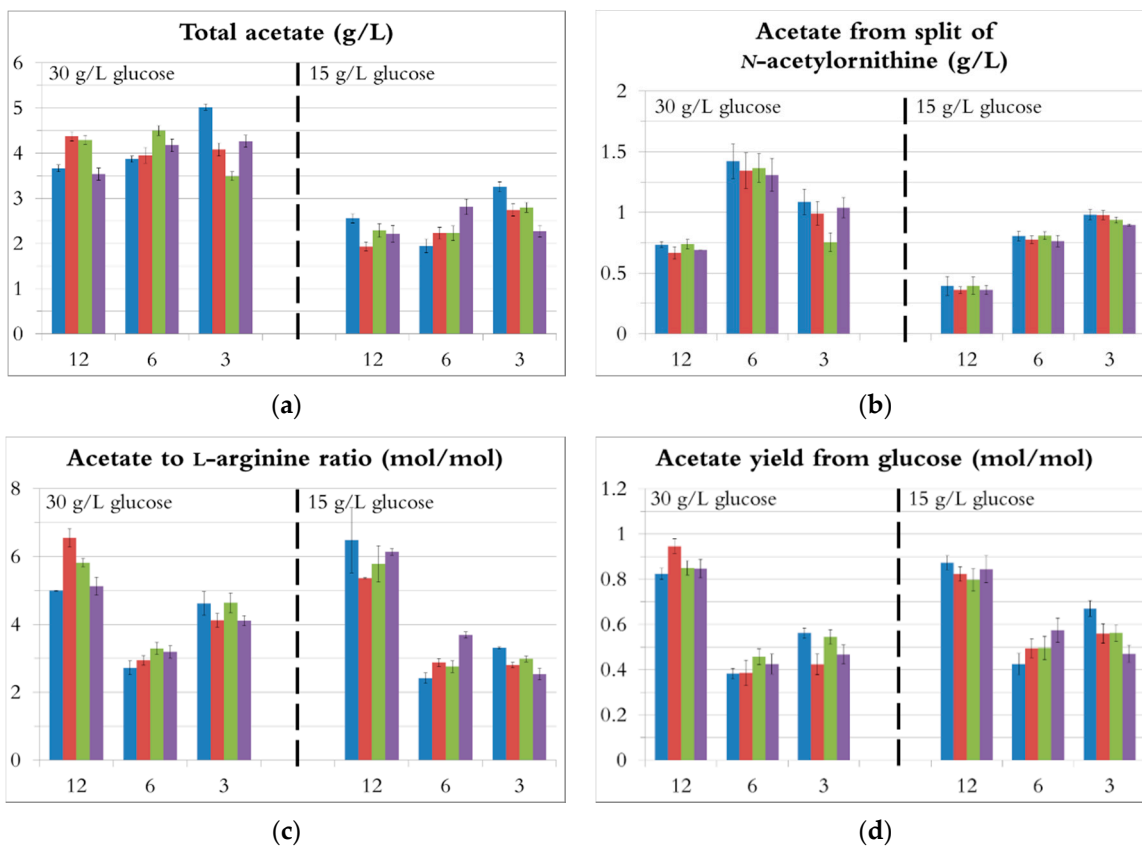

Figure S3. Acetate production during the fermentations; Total acetate formation (a), acetate formation from the split of *N*-acetylornithine (b), production of acetate per mole of L-arginine (c), acetate yield from glucose (d);  $(\text{NH}_4)_2\text{SO}_4$  in blue,  $(\text{NH}_4)_2\text{HPO}_4$  in red,  $\text{NH}_4\text{Cl}$  in green,  $\text{NH}_4\text{OH}$  in purple.
